# Supplementary material for: Effects of stereoelectronic interactions on the relativistic spin–orbit and paramagnetic components of the 13C NMR shielding tensors of dihaloethenes
Source: Royal Society of Chemistry journal article supplement (doi:10.1039/c5cp02026c), 2015-01-01
Supplement: c5cp02026c1.pdf [file c5cp02026c1.pdf]

SUPPORTING INFORMATION:

**Effects of Steric Interactions on the Relativistic Spin-Orbit  
and Paramagnetic Components of the  $^{13}\text{C}$  NMR Shielding  
Tensors of Di-haloethenes**

Renan V. Viesser<sup>a</sup>, Lucas C. Ducati<sup>b</sup>, Jochen Autschbach<sup>c</sup> and Cláudio F. Tormena<sup>a,\*</sup>

*<sup>a</sup>Chemical Institute, University of Campinas - UNICAMP, P.O. Box: 6154, 13083-970  
Campinas, SP, Brazil.*

*<sup>b</sup>Institute of Chemistry, University of São Paulo, CP 26077, 05513-970 São Paulo, SP, Brazil.*

*<sup>c</sup>Department of Chemistry, University at Buffalo, State University of New York, Buffalo, New York  
14260-3000, United States.*

**Comparative Analyses of Basis Function and Inclusion of the Solvent Model between theoretical data of  $^{13}\text{C}$  NMR chemical shifts obtained for *cis*- and *trans*-1,2-dihaloethenes.**

**Table 1S.** Theoretical  $^{13}\text{C}$  NMR chemical shifts ( $\delta_{\text{theo}}$ ) and shielding tensors for each PAS coordinate ( $\sigma_{11}$ ,  $\sigma_{22}$  and  $\sigma_{33}$ ) for *cis*- and *trans*-1,2-diiodoethenes calculated with different combinations of basis/solvent model.

| Method            | $\delta_{\text{theo}}$ |              |             | $\sigma_{11}$ |              |              | $\sigma_{22}$ |              |              | $\sigma_{33}$ |              |              |
|-------------------|------------------------|--------------|-------------|---------------|--------------|--------------|---------------|--------------|--------------|---------------|--------------|--------------|
|                   | <i>cis</i>             | <i>trans</i> | $\Delta^a$  | <i>cis</i>    | <i>trans</i> | $\Delta^b$   | <i>cis</i>    | <i>trans</i> | $\Delta^b$   | <i>cis</i>    | <i>trans</i> | $\Delta^b$   |
| <b>TZ2P</b>       | 104.9                  | 82.7         | <b>22.2</b> | -16.7         | 8.0          | <b>-24.7</b> | 129.6         | 141.1        | <b>-11.5</b> | 157.0         | 187.5        | <b>-30.5</b> |
| <b>TZ2P/COSMO</b> | 106.7                  | 84.9         | <b>21.8</b> | -19.0         | 5.5          | <b>-24.5</b> | 126.7         | 137.8        | <b>-11.1</b> | 156.6         | 187.3        | <b>-30.7</b> |
| <b>QZ4P</b>       | 110.0                  | 87.6         | <b>22.4</b> | -28.7         | -2.8         | <b>-25.9</b> | 118.8         | 129.6        | <b>-10.8</b> | 149.0         | 180.8        | <b>-31.8</b> |
| <b>QZ4P/COSMO</b> | 112.5                  | 90.1         | <b>22.4</b> | -30.6         | -5.2         | <b>-25.4</b> | 116.4         | 126.9        | <b>-10.5</b> | 148.8         | 180.5        | <b>-31.7</b> |

<sup>a</sup>  $\Delta = \delta_{\text{cis}} - \delta_{\text{trans}}$ . <sup>b</sup>  $\Delta = \sigma_{\text{cis}} - \sigma_{\text{trans}}$ .

**Experimental and theoretical data of  $^{13}\text{C}$  NMR chemical shifts obtained for *cis*- and *trans*-1,2-dihaloethenes with different DFT methods (B3LYP, PBE0 and BP86).**

**Table 2S.** The experimental ( $\delta_{\text{exp}}$ ) and theoretical ( $\delta_{\text{theo}}^{\text{a,b}}$ )  $^{13}\text{C}$  NMR chemical shift, the nuclear shielding tensor ( $\sigma_{\text{total}}^{\text{c}}$ ) and the diamagnetic ( $\sigma_{\text{dia}}$ ), paramagnetic ( $\sigma_{\text{para}}$ ) and spin-orbit ( $\sigma_{\text{so}}$ ) components obtained for *cis*- and *trans*-1,2-dihaloethenes, calculated at the B3LYP/TZ2P level and using the SO-ZORA Hamiltonian.

|           | <i>cis</i>            |                        |                      |                         |                        |                       | <i>trans</i>          |                        |                      |                         |                        |                       |
|-----------|-----------------------|------------------------|----------------------|-------------------------|------------------------|-----------------------|-----------------------|------------------------|----------------------|-------------------------|------------------------|-----------------------|
|           | $\sigma_{\text{dia}}$ | $\sigma_{\text{para}}$ | $\sigma_{\text{SO}}$ | $\sigma_{\text{total}}$ | $\delta_{\text{theo}}$ | $\delta_{\text{exp}}$ | $\sigma_{\text{dia}}$ | $\sigma_{\text{para}}$ | $\sigma_{\text{SO}}$ | $\sigma_{\text{total}}$ | $\delta_{\text{theo}}$ | $\delta_{\text{exp}}$ |
| <b>F</b>  | 238.1                 | -202.5                 | 1.3                  | 36.8                    | 149.6                  | 138.5 <sup>d</sup>    | 237.1                 | -211.1                 | 1.2                  | 27.2                    | 159.2                  | 146.8 <sup>d</sup>    |
| <b>Cl</b> | 246.2                 | -198.4                 | 3.6                  | 51.4                    | 135.0                  | 120.8                 | 242.5                 | -194.5                 | 3.8                  | 51.8                    | 134.6                  | 120.3                 |
| <b>Br</b> | 243.2                 | -199.7                 | 14.6                 | 58.0                    | 128.4                  | 113.6                 | 239.4                 | -191.0                 | 16.7                 | 65.0                    | 121.5                  | 107.3                 |
| <b>I</b>  | 243.6                 | -200.0                 | 33.6                 | 76.4                    | 110.0                  | 97.8                  | 243.6                 | -188.8                 | 41.5                 | 95.6                    | 90.8                   | 80.4                  |

<sup>a</sup>  $\delta_{\text{theo}} = \sigma_{\text{TMS}} - \sigma_{\text{total}}$ . <sup>b</sup> The TMS shielding tensor is 186.4 ppm for respective level of theory. <sup>c</sup>  $\sigma_{\text{total}} = \sigma_{\text{dia}} + \sigma_{\text{para}} + \sigma_{\text{SO}}$ . <sup>d</sup> Experimental values were taken from ref. 46.

**Table 3S.** The experimental ( $\delta_{\text{exp}}$ ) and theoretical ( $\delta_{\text{theo}}^{\text{a,b}}$ )  $^{13}\text{C}$  NMR chemical shift, the nuclear shielding tensor ( $\sigma_{\text{total}}^{\text{c}}$ ) and the diamagnetic ( $\sigma_{\text{dia}}$ ), paramagnetic ( $\sigma_{\text{para}}$ ) and spin-orbit ( $\sigma_{\text{so}}$ ) components obtained for *cis*- and *trans*-1,2-dihaloethenes, calculated at the PBE0/TZ2P level and using the SO-ZORA Hamiltonian.

|           | <i>cis</i>            |                        |                      |                         |                        |                       | <i>trans</i>          |                        |                      |                         |                        |                       |
|-----------|-----------------------|------------------------|----------------------|-------------------------|------------------------|-----------------------|-----------------------|------------------------|----------------------|-------------------------|------------------------|-----------------------|
|           | $\sigma_{\text{dia}}$ | $\sigma_{\text{para}}$ | $\sigma_{\text{SO}}$ | $\sigma_{\text{total}}$ | $\delta_{\text{theo}}$ | $\delta_{\text{exp}}$ | $\sigma_{\text{dia}}$ | $\sigma_{\text{para}}$ | $\sigma_{\text{SO}}$ | $\sigma_{\text{total}}$ | $\delta_{\text{theo}}$ | $\delta_{\text{exp}}$ |
| <b>F</b>  | 237.8                 | -194.0                 | 1.3                  | 45.2                    | 146.7                  | 138.5 <sup>d</sup>    | 236.9                 | -202.6                 | 1.2                  | 35.5                    | 156.4                  | 146.8 <sup>d</sup>    |
| <b>Cl</b> | 246.4                 | -190.3                 | 3.4                  | 59.5                    | 132.4                  | 120.8                 | 242.6                 | -186.6                 | 3.6                  | 59.6                    | 132.3                  | 120.3                 |
| <b>Br</b> | 242.9                 | -191.2                 | 13.6                 | 65.2                    | 126.7                  | 113.6                 | 238.8                 | -183.1                 | 15.5                 | 71.2                    | 120.7                  | 107.3                 |
| <b>I</b>  | 242.7                 | -191.3                 | 30.9                 | 81.6                    | 110.3                  | 97.8                  | 242.9                 | -181.7                 | 38.5                 | 99.2                    | 92.7                   | 80.4                  |

<sup>a</sup>  $\delta_{\text{theo}} = \sigma_{\text{TMS}} - \sigma_{\text{total}}$ . <sup>b</sup> TMS shielding tensor is 191.9 ppm for respective level of theory. <sup>c</sup>  $\sigma_{\text{total}} = \sigma_{\text{dia}} + \sigma_{\text{para}} + \sigma_{\text{SO}}$ . <sup>d</sup> Experimental values were taken from ref. 46.

**Table 4S.** The experimental ( $\delta_{\text{exp}}$ ) and theoretical ( $\delta_{\text{theo}}^{\text{a,b}}$ )  $^{13}\text{C}$  NMR chemical shift, the nuclear shielding tensor ( $\sigma_{\text{total}}^{\text{c}}$ ) and the diamagnetic ( $\sigma_{\text{dia}}$ ), paramagnetic ( $\sigma_{\text{para}}$ ) and spin-orbit ( $\sigma_{\text{so}}$ ) components obtained for *cis*- and *trans*-1,2-dihaloethenes, calculated at the BP86/TZ2P level and using the SO-ZORA Hamiltonian.

|           | <i>cis</i>            |                        |                      |                         |                        |                       | <i>trans</i>          |                        |                      |                         |                        |                       |
|-----------|-----------------------|------------------------|----------------------|-------------------------|------------------------|-----------------------|-----------------------|------------------------|----------------------|-------------------------|------------------------|-----------------------|
|           | $\sigma_{\text{dia}}$ | $\sigma_{\text{para}}$ | $\sigma_{\text{SO}}$ | $\sigma_{\text{total}}$ | $\delta_{\text{theo}}$ | $\delta_{\text{exp}}$ | $\sigma_{\text{dia}}$ | $\sigma_{\text{para}}$ | $\sigma_{\text{SO}}$ | $\sigma_{\text{total}}$ | $\delta_{\text{theo}}$ | $\delta_{\text{exp}}$ |
| <b>F</b>  | 237.2                 | -200.4                 | 1.3                  | 38.1                    | 146.7                  | 138.5 <sup>d</sup>    | 237.3                 | -209.6                 | 1.2                  | 28.8                    | 156.0                  | 146.8 <sup>d</sup>    |
| <b>Cl</b> | 244.8                 | -194.0                 | 3.4                  | 54.2                    | 130.6                  | 120.8                 | 244.5                 | -194.0                 | 3.6                  | 54.0                    | 130.8                  | 120.3                 |
| <b>Br</b> | 241.8                 | -195.4                 | 13.3                 | 59.6                    | 125.2                  | 113.6                 | 241.5                 | -190.7                 | 15.7                 | 66.5                    | 118.4                  | 107.3                 |
| <b>I</b>  | 243.6                 | -197.5                 | 29.1                 | 74.5                    | 110.3                  | 97.8                  | 243.8                 | -186.0                 | 38.3                 | 95.4                    | 89.4                   | 80.4                  |

<sup>a</sup>  $\delta_{\text{theo}} = \sigma_{\text{TMS}} - \sigma_{\text{total}}$ . <sup>b</sup> TMS shielding tensor is 184.8 ppm for respective level of theory. <sup>c</sup>  $\sigma_{\text{total}} = \sigma_{\text{dia}} + \sigma_{\text{para}} + \sigma_{\text{SO}}$ . <sup>d</sup> Experimental values were taken from ref. 46.

Analyses of the effect of numerical integration based on Voronoi method for the *cis*- and *trans*-1,2-diiodoethenes.

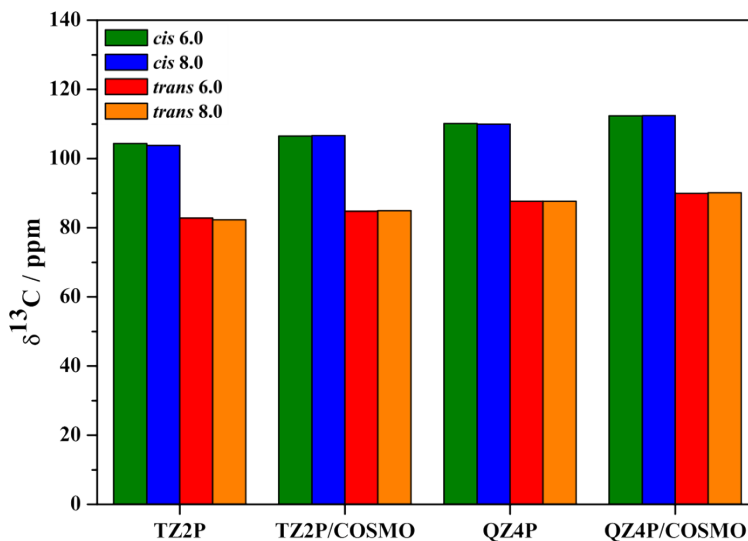

**Figure 1S.** Calculated  $^{13}\text{C}$  NMR chemical shifts for *cis*- and *trans*-1,2-diiodoethene using the KT2/SO-ZORA level of theory with the TZ2P or QZ4P basis set, with and without the COSMO-RS solvent model. Each bar represents a numerical integration parameter used: 6.0 or 8.0. Geometry optimizations and SCF calculations were performed with the same integration parameter.

Graphical representations of the  $^{13}\text{C}$  NMR shielding tensor for the *cis*- and *trans*-1,2-dihaloethenes (halo = F, Cl and Br).

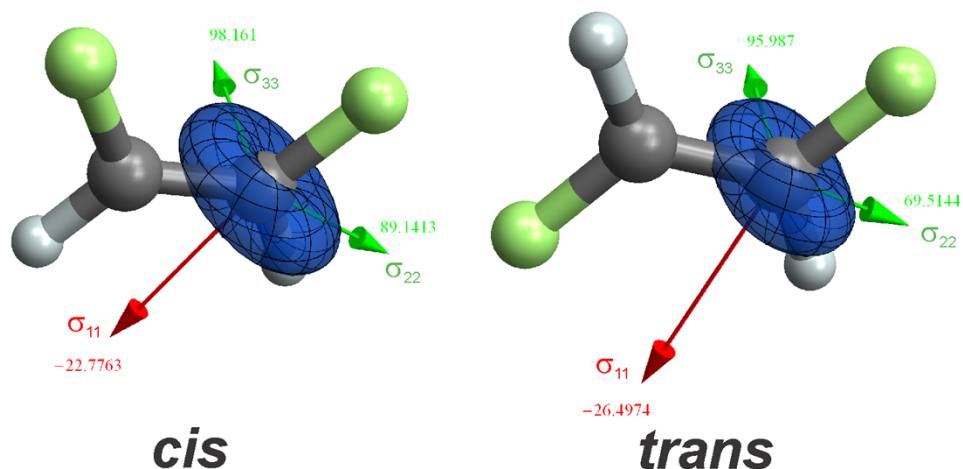

**Figure 2S.** Graphical representations of  $^{13}\text{C}$  NMR shielding tensor for *cis*- and *trans*-difluoroethene. The arrows display the signs of the shielding tensor (red for negative terms and green for positive ones), and the surface indicates the magnitude of the shielding for a magnetic field in the direction of the carbon nucleus to a point on the surface via its distance from the carbon (polar plot).

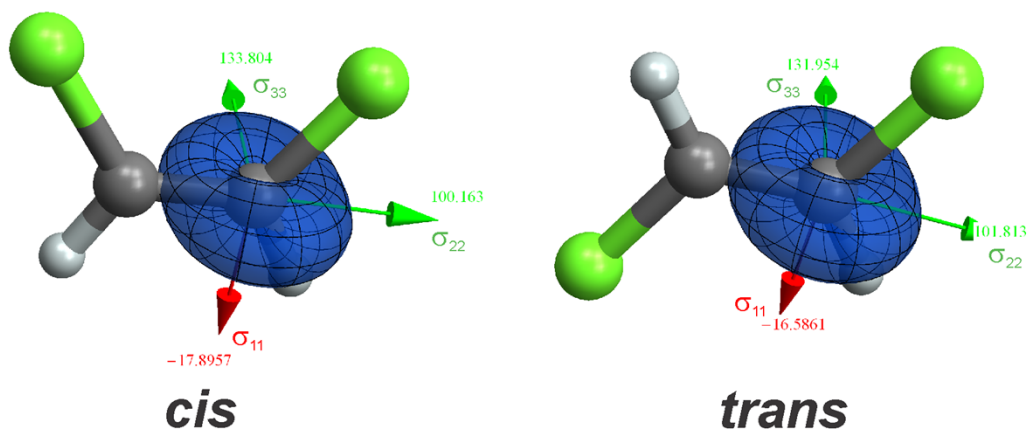

**Figure 3S.** Graphical representations of  $^{13}\text{C}$  NMR shielding tensor for *cis*- and *trans*-dichloroethene. The arrows display the signs of the shielding tensor (red for negative terms and green for positive ones), and the surface indicates the magnitude of the shielding for a magnetic field in the direction of the carbon nucleus to a point on the surface via its distance from the carbon (polar plot).

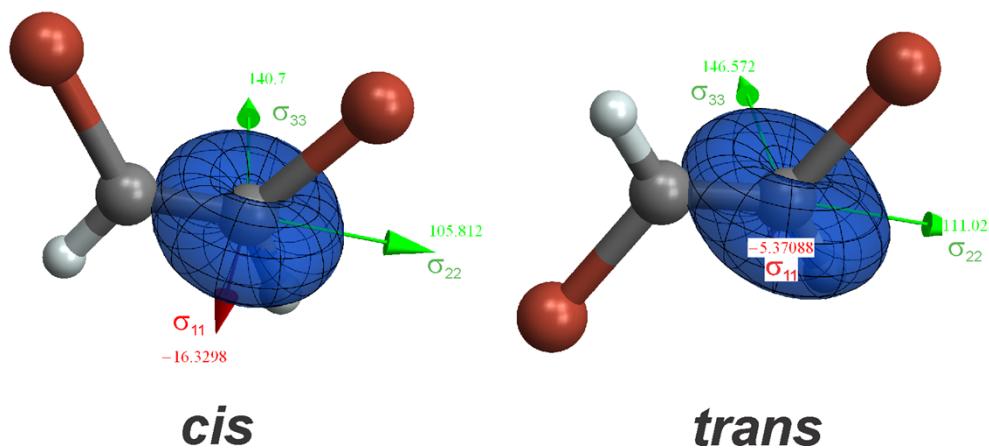

**Figure 4S.** Graphical representations of  $^{13}\text{C}$  NMR shielding tensor for *cis*- and *trans*-dibromoethene. The arrows display the signs of the shielding tensor (red for negative terms and green for positive ones), and the surface indicates the magnitude of the shielding for a magnetic field in the direction of the carbon nucleus to a point on the surface via its distance from the carbon (polar plot).



**Relevant NBO contributions for the  $^{13}\text{C}$  NMR shielding tensor for each PAS orientation for *cis*- and *trans*-1,2-dihaloethenes.**

**Table 5S.** Relevant NBO contributions (in ppm) for the paramagnetic ( $\sigma_{\text{para}}$ ) and spin-orbit ( $\sigma_{\text{SO}}$ ) components of the  $^{13}\text{C}$  NMR shielding tensor for each PAS orientation for *cis*- and *trans*-1,2-dihaloethenes, calculated at the KT2/TZ2P level and using the SO-ZORA Hamiltonian.  $X_{\alpha}$  means the halogen directly bonded to  $^{13}\text{C}$  of the shielding tensor calculated and the  $X_{\beta}$  is associated with the neighbour carbon atom.

|           |                        | NBO                   |              |                    |              |                                    |              |                                    |              |                                   |              |                                   |              |                         |              |                      |              |                                      |              |                                      |              |  |
|-----------|------------------------|-----------------------|--------------|--------------------|--------------|------------------------------------|--------------|------------------------------------|--------------|-----------------------------------|--------------|-----------------------------------|--------------|-------------------------|--------------|----------------------|--------------|--------------------------------------|--------------|--------------------------------------|--------------|--|
|           |                        | $\sigma_{\text{C-C}}$ |              | $\pi_{\text{C=C}}$ |              | $\sigma_{\text{C}\alpha\text{-H}}$ |              | $\sigma_{\text{C}\alpha\text{-X}}$ |              | $\sigma_{\text{C}\beta\text{-H}}$ |              | $\sigma_{\text{C}\beta\text{-X}}$ |              | $\sigma_{\text{C-C}}^*$ |              | $\pi_{\text{C=C}}^*$ |              | $\sigma_{\text{C}\alpha\text{-H}}^*$ |              | $\sigma_{\text{C}\alpha\text{-X}}^*$ |              |  |
|           |                        | <i>cis</i>            | <i>trans</i> | <i>cis</i>         | <i>trans</i> | <i>cis</i>                         | <i>trans</i> | <i>cis</i>                         | <i>trans</i> | <i>cis</i>                        | <i>trans</i> | <i>cis</i>                        | <i>trans</i> | <i>cis</i>              | <i>trans</i> | <i>cis</i>           | <i>trans</i> | <i>cis</i>                           | <i>trans</i> | <i>cis</i>                           | <i>trans</i> |  |
|           | $\sigma_{11}$          | -131.5                | -152.6       | -56.0              | -42.0        | -7.6                               | -33.9        | -54.1                              | -30.5        | -13.4                             | -6.3         | -1.3                              | -5.9         | 0.1                     | -0.5         | -5.6                 | -0.3         | 0.5                                  | 2.4          | 9.3                                  | 3.6          |  |
| <b>F</b>  | $\sigma_{\text{para}}$ |                       |              |                    |              |                                    |              |                                    |              |                                   |              |                                   |              |                         |              |                      |              |                                      |              |                                      |              |  |
|           | $\sigma_{22}$          | -25.0                 | -6.9         | -15.1              | -42.8        | -107.2                             | -92.1        | -23.4                              | -42.0        | -2.0                              | -10.6        | -9.3                              | -3.6         | -0.1                    | -0.0         | 1.1                  | -3.4         | 10.8                                 | 11.3         | 5.9                                  | 7.1          |  |
|           | $\sigma_{33}$          | -49.7                 | -50.9        | -0.11              | -0.17        | -44.9                              | -45.9        | -15.6                              | -14.1        | -2.7                              | -1.5         | -0.1                              | 0.3          | -3.4                    | -4.4         | 0.1                  | -0.1         | 0.1                                  | 0.2          | 5.2                                  | 5.1          |  |
|           | $\sigma_{11}$          | -149.5                | -149.5       | -14.1              | -14.1        | -32.7                              | -32.7        | -44.4                              | -44.4        | -11.9                             | -11.9        | -8.8                              | -8.8         | 0.8                     | 0.8          | -6.7                 | -6.7         | 2.7                                  | 2.7          | 4.3                                  | 4.3          |  |
| <b>Cl</b> | $\sigma_{\text{para}}$ |                       |              |                    |              |                                    |              |                                    |              |                                   |              |                                   |              |                         |              |                      |              |                                      |              |                                      |              |  |
|           | $\sigma_{22}$          | -1.0                  | -1.0         | -3.2               | -3.2         | -92.8                              | -92.8        | -70.6                              | -70.6        | -10.3                             | -10.3        | -16.3                             | -16.3        | -0.1                    | -0.1         | -8.8                 | -8.8         | 14.0                                 | 14.0         | 15.8                                 | 15.8         |  |
|           | $\sigma_{33}$          | -40.2                 | -40.2        | 0.0                | 0.0          | -33.2                              | -33.2        | -9.2                               | -9.2         | -2.5                              | -2.5         | -2.1                              | -2.1         | -8.2                    | -8.2         | 0.1                  | 0.1          | -3.6                                 | -3.6         | 3.2                                  | 3.2          |  |
| <b>Br</b> | $\sigma_{\text{para}}$ |                       |              |                    |              |                                    |              |                                    |              |                                   |              |                                   |              |                         |              |                      |              |                                      |              |                                      |              |  |
|           | $\sigma_{11}$          | -146.2                | -147.0       | -8.16              | -7.8         | -35.9                              | -56.1        | -49.2                              | -28.6        | -11.9                             | -12.9        | -10.4                             | -10.2        | 0.4                     | -0.1         | -11.8                | -2.7         | 2.6                                  | 1.7          | 3.7                                  | 6.2          |  |

|          |               |                 |               |        |       |       |       |       |        |        |        |       |       |       |       |       |       |       |       |      |      |      |      |
|----------|---------------|-----------------|---------------|--------|-------|-------|-------|-------|--------|--------|--------|-------|-------|-------|-------|-------|-------|-------|-------|------|------|------|------|
|          | $\sigma_{22}$ | -0.8            | -0.1          | 4.6    | 9.2   | -92.6 | -76.6 | -85.4 | -100.6 | -11.9  | -11.3  | -19.1 | -19.7 | -0.2  | 0.0   | -12.6 | -15.2 | 16.0  | 15.1  | 19.6 | 17.7 |      |      |
|          | $\sigma_{33}$ | -42.8           | -43.4         | 0.1    | 0.0   | -32.0 | -34.0 | -9.2  | -7.2   | -2.5   | -5.8   | -4.8  | -1.5  | -12.0 | -10.8 | 0.0   | -0.2  | -2.7  | -4.2  | 3.3  | 11.2 |      |      |
|          | $\sigma_{11}$ | -0.8            | 1.6           | 0.8    | 1.1   | -8.1  | -10.2 | 10.7  | 9.8    | 1.8    | -1.9   | -1.9  | 2.5   | 2.4   | 2.9   | 1.5   | 1.0   | -0.0  | -0.2  | 0.8  | 0.8  |      |      |
| <b>I</b> | $\sigma_{SO}$ | $\sigma_{22}$   | 1.0           | -1.8   | 0.0   | 0.1   | 8.8   | 10.4  | -7.3   | -5.8   | -1.6   | 1.8   | 2.0   | -1.7  | -0.3  | -0.3  | -3.3  | -2.5  | 0.7   | 0.4  | 7.4  | 8.8  |      |
|          |               | $\sigma_{33}$   | -0.7          | -0.3   | -1.1  | -1.6  | 1.3   | -0.4  | 2.5    | 3.5    | 0.2    | 0.2   | -0.5  | 0.1   | -1.4  | 0.6   | 0.5   | 0.4   | 2.2   | 3.0  | 7.8  | 10.2 |      |
|          |               | $\sigma_{11}$   | -145.0        | -144.2 | -4.2  | -0.8  | -45.8 | -54.7 | -44.7  | -34.2  | -10.6  | -13.6 | -15.6 | -12.4 | 0.7   | 0.6   | -15.6 | -4.9  | 4.2   | 0.8  | 2.4  | 7.9  |      |
|          |               | $\sigma_{para}$ | $\sigma_{22}$ | 0.0    | -0.2  | 25.3  | 31.1  | -89.5 | -79.7  | -114.2 | -121.4 | -15.7 | -12.6 | -21.1 | -26.1 | 0.1   | 0.0   | -20.4 | -20.9 | 18.6 | 18.4 | 25.2 | 22.6 |
|          |               |                 | $\sigma_{33}$ | -40.9  | -40.5 | 0.1   | 0.1   | -30.3 | -33.1  | -9.3   | -7.1   | -2.4  | -8.8  | -8.7  | -1.4  | -17.6 | -14.1 | -0.0  | -0.2  | -2.1 | -5.5 | 1.7  | 14.2 |
|          |               |                 | $\sigma_{11}$ | 5.0    | 9.7   | -1.7  | -1.7  | -21.8 | -27.9  | 24.3   | 25.7   | 4.5   | -5.5  | -5.9  | 7.6   | 4.0   | 6.5   | 4.5   | 4.0   | 1.3  | 1.1  | -3.3 | -4.6 |
|          | $\sigma_{SO}$ | $\sigma_{22}$   | -4.8          | -10.5  | 4.2   | 5.1   | 22.1  | 27.0  | -15.7  | -15.1  | -4.3   | 5.4   | 6.3   | -5.5  | 1.8   | 1.2   | -9.0  | -7.7  | 1.5   | 0.3  | 19.7 | 26.1 |      |
|          |               | $\sigma_{33}$   | -3.0          | -1.2   | -3.4  | -4.5  | 4.1   | -1.9  | 6.5    | 10.9   | 0.2    | 0.3   | -1.8  | -0.0  | -7.7  | 1.7   | 1.9   | 1.5   | 2.7   | 7.7  | 19.0 | 23.6 |      |

**NLMO contributions of the halogen lone pairs for the  $^{13}\text{C}$  NMR shielding tensor for each PAS orientation for *cis*- and *trans*-1,2-dihaloethenes.**

**Table 6S.** NLMO contributions (in ppm) of the halogen *lone pairs* (LP) for the paramagnetic ( $\sigma_{\text{para}}$ ) and spin-orbit ( $\sigma_{\text{SO}}$ ) components of the  $^{13}\text{C}$  NMR shielding tensor for each PAS orientation for *cis*- and *trans*-1,2-dihaloethenes, calculated at the KT2/TZ2P level and using the SO-ZORA Hamiltonian.  $X_{\alpha}$  means the halogen directly bonded to  $^{13}\text{C}$  of the shielding tensor calculated and the  $X_{\beta}$  is associated with the neighbour carbon atom.

| LP <sub>1</sub> (X <sub>α</sub> ) |              | LP <sub>2</sub> (X <sub>α</sub> ) |              | LP <sub>3</sub> (X <sub>α</sub> ) |              | LP <sub>1</sub> (X <sub>β</sub> ) |              | LP <sub>2</sub> (X <sub>β</sub> ) |              | LP <sub>3</sub> (X <sub>β</sub> ) |              |
|-----------------------------------|--------------|-----------------------------------|--------------|-----------------------------------|--------------|-----------------------------------|--------------|-----------------------------------|--------------|-----------------------------------|--------------|
| <i>cis</i>                        | <i>trans</i> |
|                                   |              |                                   |              |                                   |              |                                   |              |                                   |              |                                   |              |

---

|           |                        |               |      |      |      |      |      |      |      |      |      |      |      |      |
|-----------|------------------------|---------------|------|------|------|------|------|------|------|------|------|------|------|------|
|           |                        | $\sigma_{11}$ | -9.7 | -5.4 | 0.2  | 1.3  | -2.6 | -0.7 | -0.1 | -0.1 | -6.4 | -4.4 | -2.5 | -0.5 |
| <b>F</b>  | $\sigma_{\text{para}}$ | $\sigma_{22}$ | -4.5 | -7.6 | 2.0  | 0.8  | 0.7  | -1.0 | 0.4  | 0.7  | -0.2 | -1.3 | -0.6 | -2.5 |
|           |                        | $\sigma_{33}$ | -8.4 | -7.7 | -3.1 | -2.8 | -1.0 | -1.2 | -0.4 | -0.5 | -1.0 | -1.3 | -0.2 | -0.3 |
|           |                        | $\sigma_{11}$ | -3.7 | -3.6 | -1.2 | -1.2 | -3.6 | -3.5 | -0.2 | -0.2 | -6.7 | -6.8 | -0.9 | -0.8 |
| <b>Cl</b> | $\sigma_{\text{para}}$ | $\sigma_{22}$ | -8.7 | -8.6 | 0.5  | 0.4  | -6.3 | -6.1 | 1.1  | 1.0  | 1.2  | 1.1  | 2.0  | 2.0  |
|           |                        | $\sigma_{33}$ | -5.2 | -5.0 | -2.8 | -2.8 | -0.9 | -1.0 | -0.3 | -0.3 | -4.1 | -4.0 | -0.1 | -0.1 |
|           |                        | $\sigma_{11}$ | -2.9 | -1.4 | -2.1 | -1.6 | -4.4 | -1.4 | -0.2 | -0.0 | -5.5 | -3.5 | -2.6 | 0.3  |
| <b>Br</b> | $\sigma_{\text{para}}$ | $\sigma_{22}$ | -8.7 | -9.7 | 0.3  | -0.3 | -7.2 | -8.6 | 1.3  | 1.2  | 1.6  | -0.6 | 3.5  | 5.8  |
|           |                        | $\sigma_{33}$ | -4.1 | -4.4 | -0.1 | 0.7  | -0.7 | -1.2 | -0.4 | -0.6 | -6.0 | -2.8 | -0.1 | -0.5 |
|           |                        | $\sigma_{11}$ | 0.8  | 0.4  | 0.6  | 0.4  | 0.9  | 0.8  | -0.0 | -0.0 | -0.2 | 0.7  | -0.2 | -0.5 |
|           | $\sigma_{\text{SO}}$   | $\sigma_{22}$ | 0.4  | 0.8  | -0.5 | -0.3 | -1.3 | -1.2 | 0.0  | -0.0 | 0.3  | -0.7 | -0.0 | 0.5  |
|           |                        | $\sigma_{33}$ | 1.5  | 1.7  | -0.4 | -0.3 | 1.1  | 0.4  | -0.0 | -0.0 | -1.2 | 0.7  | -0.3 | -0.5 |

---

---

|                      |                        |               |      |       |      |      |       |       |      |       |      |      |      |     |
|----------------------|------------------------|---------------|------|-------|------|------|-------|-------|------|-------|------|------|------|-----|
|                      | $\sigma_{11}$          | -2.1          | -1.2 | -2.5  | -2.3 | -4.5 | -2.1  | -0.2  | -0.0 | -4.2  | -2.7 | -5.0 | 0.5  |     |
| <b>I</b>             | $\sigma_{\text{para}}$ | $\sigma_{22}$ | -9.4 | -10.1 | -0.1 | -0.5 | -11.2 | -11.2 | 1.4  | 1.3   | 2.7  | -0.6 | 6.9  | 9.9 |
|                      | $\sigma_{33}$          | -3.4          | -3.8 | 2.8   | 3.2  | -0.7 | -1.2  | -0.4  | -0.7 | -10.2 | -2.8 | -0.0 | -0.5 |     |
|                      | $\sigma_{11}$          | 1.0           | -0.1 | 1.4   | 1.2  | 2.4  | 2.2   | -0.0  | 0.1  | -1.0  | 2.7  | -0.4 | -1.2 |     |
| $\sigma_{\text{SO}}$ | $\sigma_{22}$          | 1.7           | 2.7  | -1.4  | -0.9 | -3.4 | -3.1  | -0.0  | -0.2 | 0.9   | -3.0 | 0.3  | 1.5  |     |
|                      | $\sigma_{33}$          | 3.6           | 4.4  | -1.3  | -0.7 | 1.1  | 1.1   | -0.0  | -0.0 | -7.0  | 1.0  | -1.1 | -1.5 |     |

---

**NBO results for *cis*- and *trans*-1,2-dihaloethenes.**

**Table 7S.** NBO occupancies<sup>a</sup> obtained using the scalar ZORA Hamiltonian and the KT2/TZ2P functional for *cis*- and *trans*-1,2-dihaloethenes.

| NBO               | <i>cis</i> |        |        |        | <i>trans</i> |        |        |        |
|-------------------|------------|--------|--------|--------|--------------|--------|--------|--------|
|                   | F          | Cl     | Br     | I      | F            | Cl     | Br     | I      |
| LP <sub>1</sub> X | 1992.8     | 1994.1 | 1994.6 | 1993.9 | 1993.3       | 1994.7 | 1995.5 | 1995.4 |
| LP <sub>2</sub> X | 1963.0     | 1964.1 | 1969.2 | 1968.8 | 1963.3       | 1962.3 | 1966.0 | 1964.5 |
| LP <sub>3</sub> X | 1916.2     | 1901.0 | 1911.7 | 1914.4 | 1922.5       | 1913.3 | 1925.0 | 1928.3 |
| $\sigma_{C-X}$    | 1995.9     | 1990.8 | 1986.7 | 1982.4 | 1993.1       | 1982.8 | 1973.3 | 1962.4 |
| $\sigma^*_{C-X}$  | 17.6       | 23.9   | 31.4   | 38.6   | 15.4         | 24.7   | 36.0   | 47.6   |
| $\sigma_{C-H}$    | 1980.6     | 1973.6 | 1969.4 | 1966.1 | 1986.8       | 1984.8 | 1983.7 | 1982.7 |
| $\sigma^*_{C-H}$  | 23.6       | 23.0   | 20.8   | 21.0   | 24.0         | 23.0   | 20.4   | 20.5   |
| $\sigma_{C-C}$    | 1996.2     | 1996.1 | 1996.6 | 1996.4 | 1996.9       | 1996.1 | 1996.3 | 1996.2 |
| $\sigma^*_{C-C}$  | 30.5       | 34.4   | 30.8   | 30.9   | 24.9         | 26.4   | 23.2   | 23.7   |
| $\pi_{C=C}$       | 1995.3     | 1987.4 | 1989.7 | 1988.9 | 1997.0       | 1988.0 | 1990.0 | 1988.9 |
| $\pi^*_{C=C}$     | 156.5      | 191.1  | 170.4  | 164.3  | 144.9        | 167.7  | 144.7  | 137.3  |

<sup>a</sup>) Occupancies are given in units of 10<sup>-3</sup>.

**Table 8S.** NBO energies<sup>a</sup> obtained using the scalar ZORA Hamiltonian and the KT2/TZ2P functional for *cis*- and *trans*-1,2-dihaloethenes.

| NBO               | <i>cis</i> |         |         |         | <i>trans</i> |         |         |         |
|-------------------|------------|---------|---------|---------|--------------|---------|---------|---------|
|                   | F          | Cl      | Br      | I       | F            | Cl      | Br      | I       |
| LP <sub>1</sub> X | -1.0179    | -0.8308 | -0.8754 | -0.8238 | -1.0242      | -0.8346 | -0.8747 | -0.8156 |
| LP <sub>2</sub> X | -0.3735    | -0.2996 | -0.2817 | -0.2561 | -0.3760      | -0.3056 | -0.2910 | -0.2718 |
| LP <sub>3</sub> X | -0.3733    | -0.2943 | -0.2698 | -0.2474 | -0.3751      | -0.2986 | -0.2735 | -0.2502 |
| $\sigma_{C-X}$    | -0.9205    | -0.6829 | -0.6097 | -0.5528 | -0.9106      | -0.6760 | -0.5997 | -0.5438 |
| $\sigma^*_{C-X}$  | 0.2060     | 0.1138  | 0.0548  | 0.0175  | 0.2001       | 0.1041  | 0.0431  | 0.0071  |
| $\sigma_{C-H}$    | -0.5264    | -0.5258 | -0.5220 | -0.5205 | -0.5288      | -0.5303 | -0.5285 | -0.5287 |
| $\sigma^*_{C-H}$  | 0.3879     | 0.3886  | 0.3956  | 0.4093  | 0.3864       | 0.3903  | 0.4008  | 0.4117  |
| $\sigma_{C-C}$    | -0.7348    | -0.7501 | -0.7527 | -0.7568 | -0.7367      | -0.7550 | -0.7592 | -0.7654 |
| $\sigma^*_{C-C}$  | 0.5295     | 0.4902  | 0.4933  | 0.4955  | 0.5312       | 0.4937  | 0.4974  | 0.4972  |
| $\pi_{C=C}$       | -0.2855    | -0.2908 | -0.2868 | -0.2866 | -0.2861      | -0.2933 | -0.2897 | -0.2908 |
| $\pi^*_{C=C}$     | -0.0283    | -0.0440 | -0.0388 | -0.0375 | -0.0292      | -0.0456 | -0.0402 | -0.0392 |

<sup>a</sup>) Energies are given in au.

Energies of frontier MOs for *cis*- and *trans*-1,2-diiodoethenes with different C=C-I bond angles.

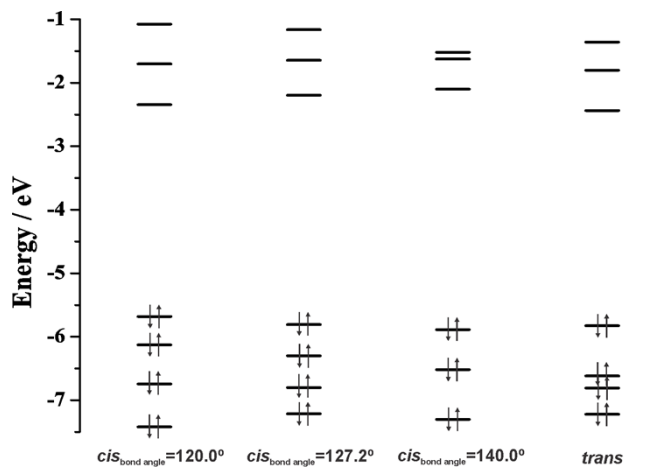

**Figure 5S.** Energies of frontier MOs for *cis*- and *trans*-diiodoethene calculated at the KT2/TZ2P level. It shows the values of energy for *cis* isomer with different C=C-I bond angles: equilibrium bond angle (127.2°) and bond angles equal to 120° and 140°.
